# Supplementary material for: Addiction to DUSP1 protects JAK2V617F-driven polycythemia vera progenitors against inflammatory stress and DNA damage, allowing chronic proliferation
Source: PubMed Central journal article supplement (PMC6756199; doi:10.1038/s41388-019-0813-7), 2019-04-09

**a**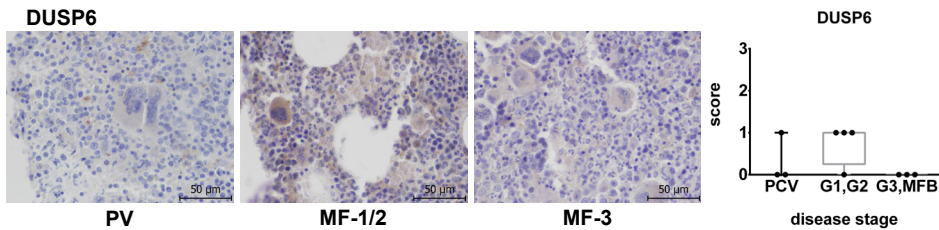**b**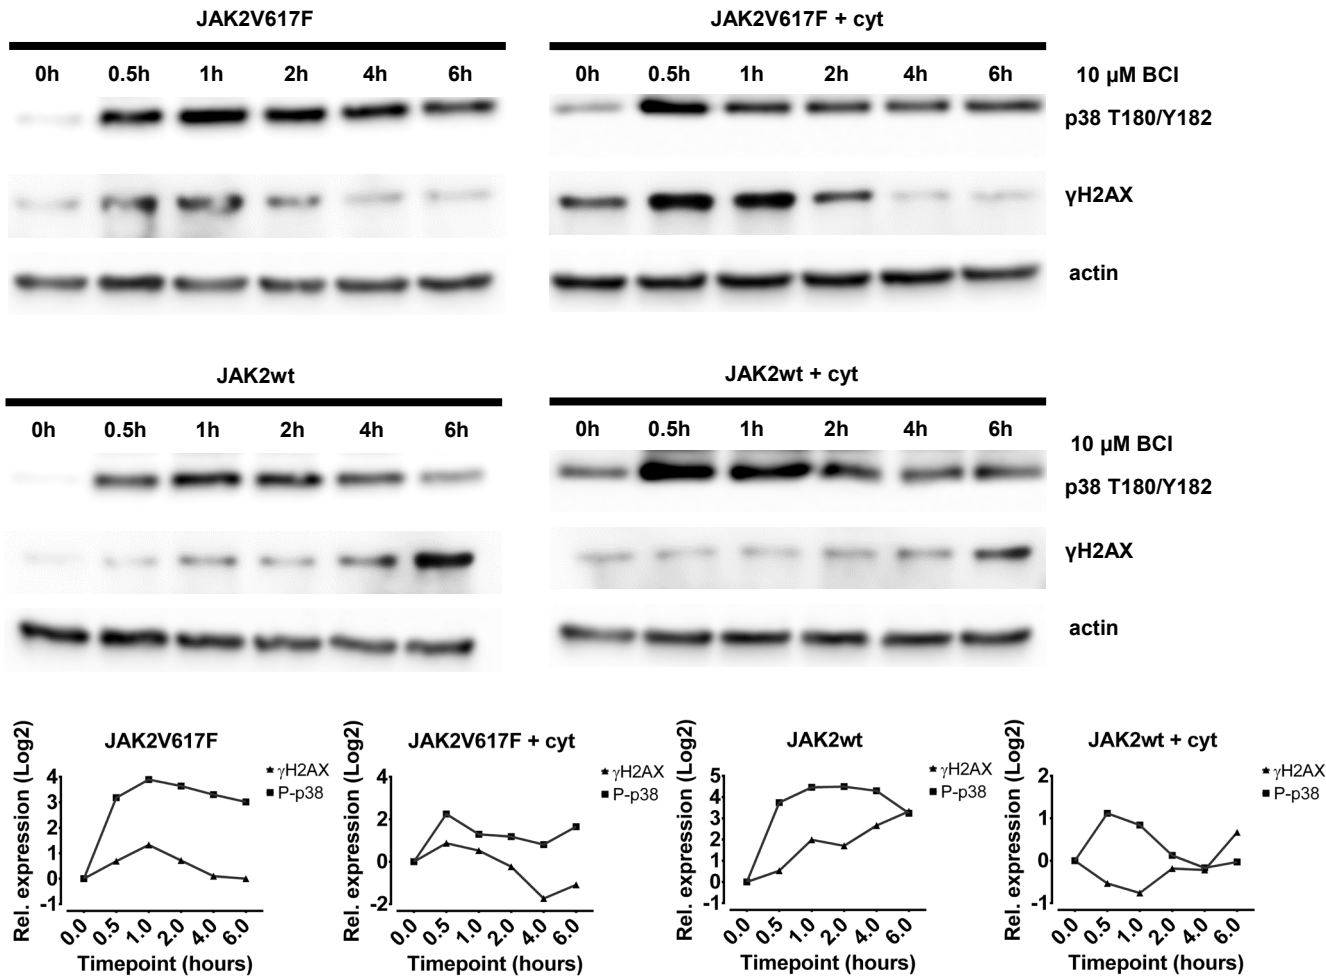**c**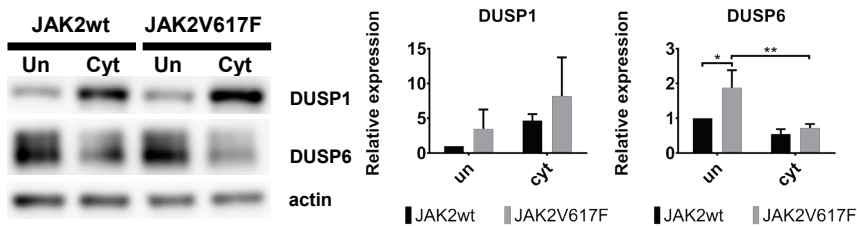**d**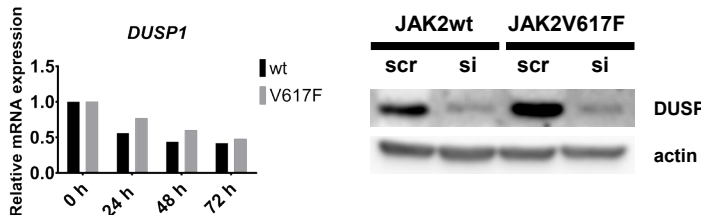**e**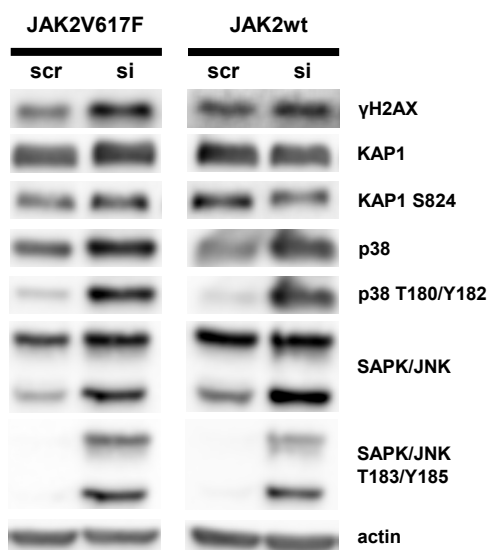

Supplement: 41388_2019_813_MOESM5_ESM.pdf [file 41388_2019_813_MOESM5_ESM.pdf]
